# Supplementary figures and images for: Fisetin Inhibits NLRP3 Inflammasome by Suppressing TLR4/MD2-Mediated Mitochondrial ROS Production
Source: MDPI journal article supplement (doi:10.3390/antiox10081215), 2021-07-28

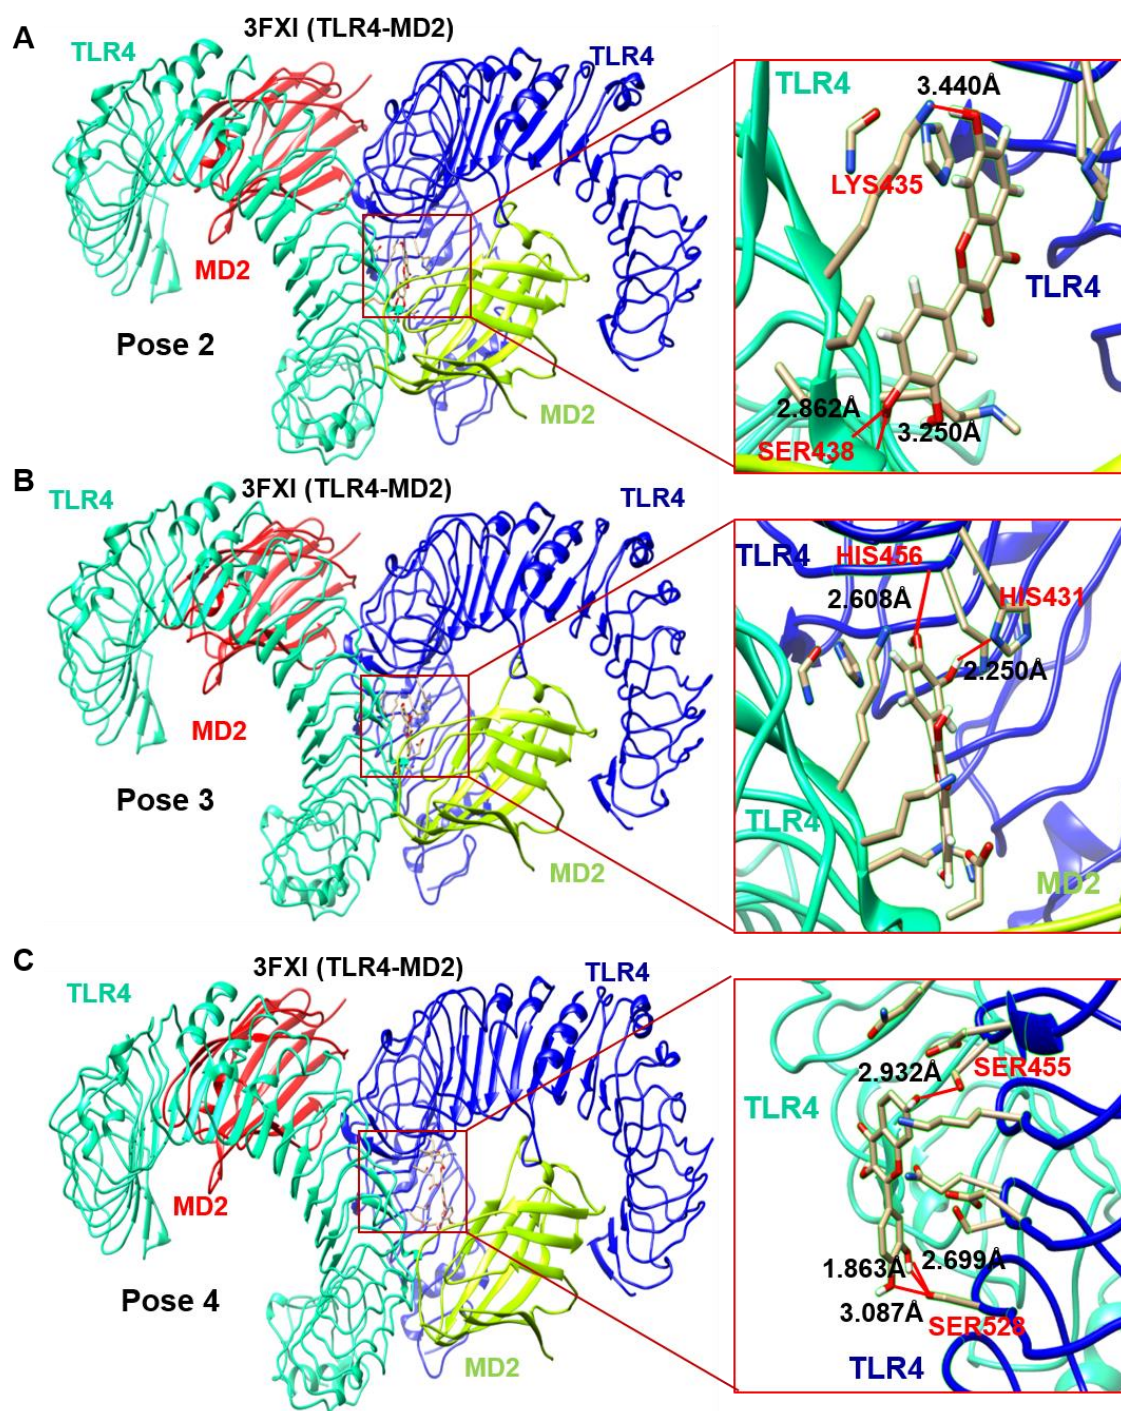

**Figure S1.** Molecular docking poses between fisetin and TLR4. (A) Pose 2, (B) pose 3, and (C) pose 4.

Supplement: s1 [file s1]
